# Supplementary material for: A Refined Staging Model for Resectable Pancreatic Ductal Adenocarcinoma Incorporating Examined Lymph Nodes, Location of Tumor and Positive Lymph Nodes Ratio
Source: PubMed Central journal article supplement — J Cancer. 2018 Sep 8;9(19):3507–14. doi: 10.7150/jca.26187 (PMC6171033; doi:10.7150/jca.26187), 2018-09-08
Supplement: jcav09p3507s1.pdf [file jcav09p3507s1.pdf]

398 **Figure S1** Refined staging scheme for resectable PDAC by recursive partitioning analysis.

399

400

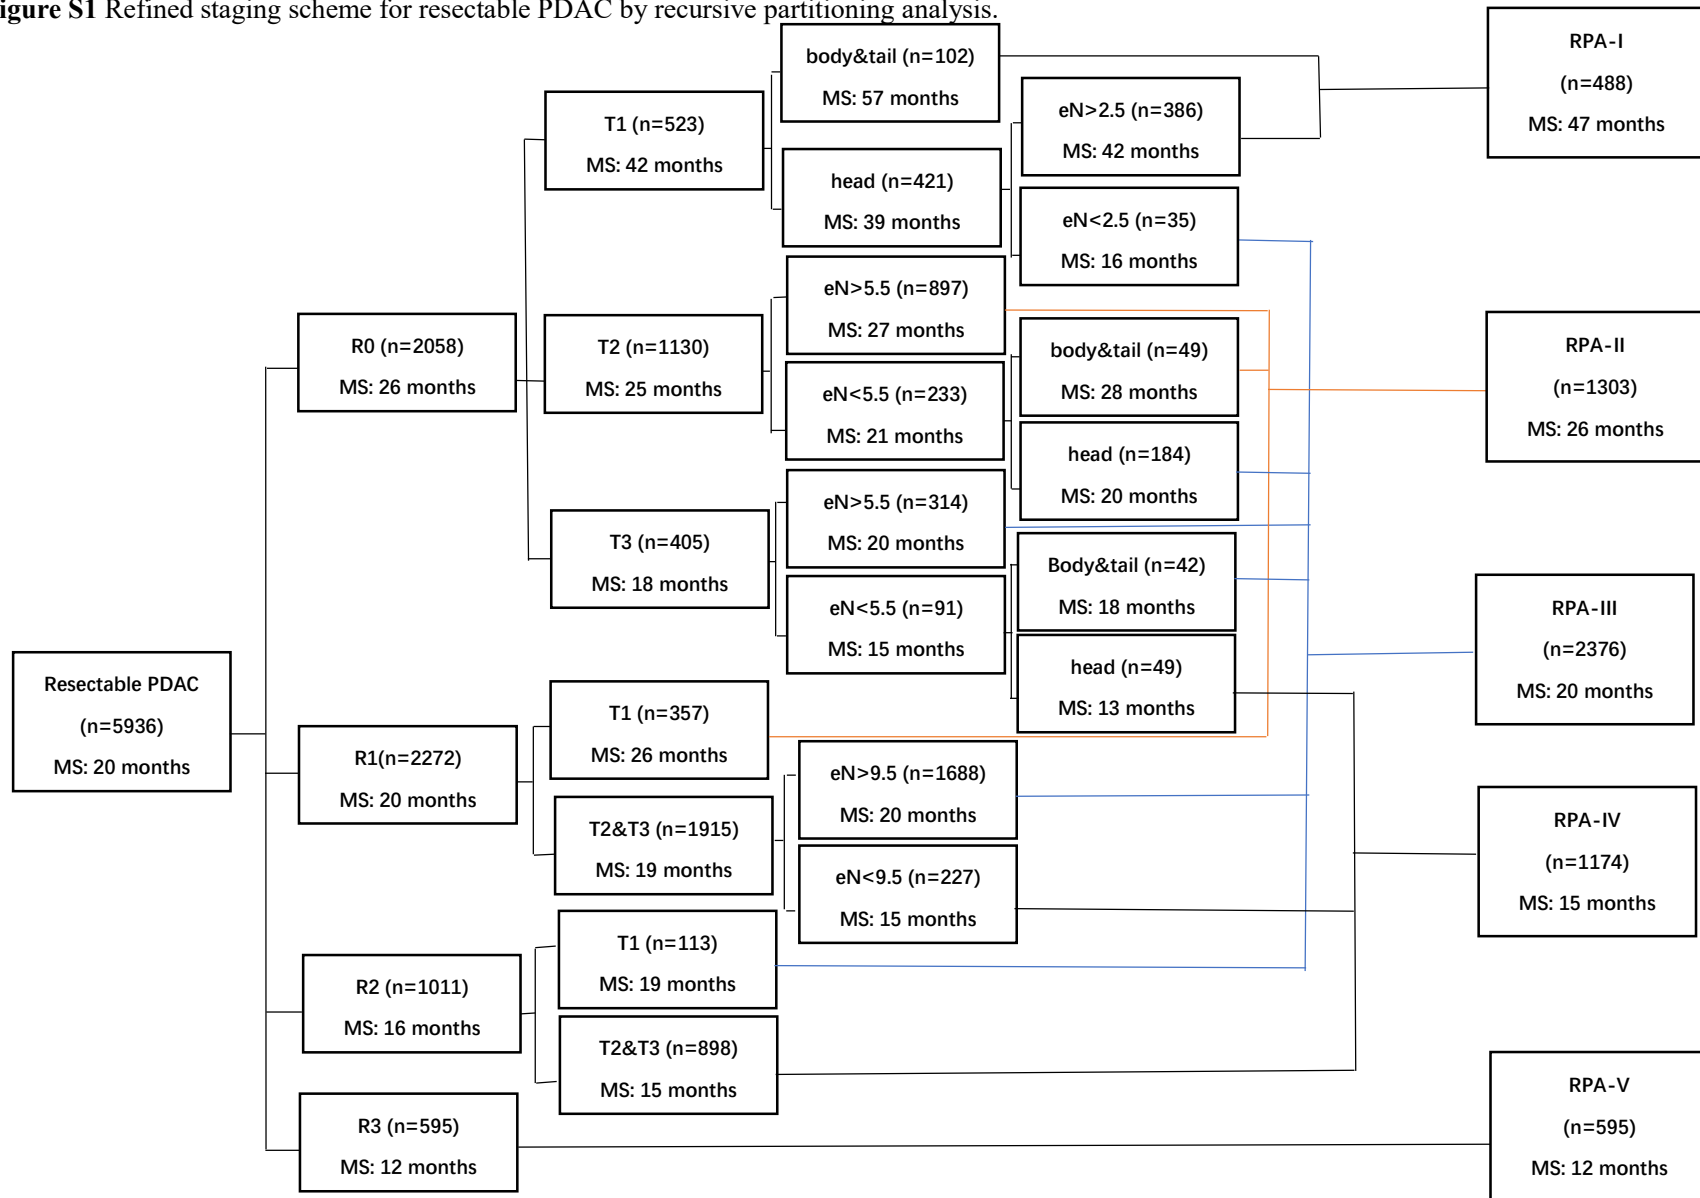

401 **Table S1** Characteristics of patients from SEER database.

| <b>Variable</b>                       | <b>Median(IQR)/N%</b> |
|---------------------------------------|-----------------------|
| <b>Age(years)</b>                     | 66(58-73)             |
| <b>Race</b>                           |                       |
| White                                 | 6935 (81.8%)          |
| Black                                 | 858 (10.1%)           |
| Other                                 | 687 (8.1%)            |
| <b>Sex</b>                            |                       |
| Male                                  | 4271 (50.4%)          |
| Female                                | 4209 (49.6%)          |
| <b>Marital status</b>                 |                       |
| Married                               | 5299 (62.5%)          |
| Never married                         | 962 (11.3%)           |
| Other                                 | 1960 (23.1%)          |
| Unknown                               | 259 (3.1%)            |
| <b>Date of diagnosis</b>              |                       |
| 2004-2006                             | 1816 (21.4%)          |
| 2007-2010                             | 3129 (36.9%)          |
| 2011-2014                             | 3535 (41.7%)          |
| <b>Tumor site</b>                     |                       |
| head                                  | 7167(84.5%)           |
| body or tail                          | 1313(15.5%)           |
| <b>Tumor grade</b>                    |                       |
| I                                     | 801(9.4%)             |
| II                                    | 4116(48.5%)           |
| III                                   | 2951(34.8%)           |
| IV                                    | 74(0.9%)              |
| not determined                        | 538(6.4%)             |
| <b>Tumor size</b>                     |                       |
| ≤2cm                                  | 1465(17.2%)           |
| >2cm and ≤4cm                         | 5050(59.6%)           |
| >4cm                                  | 1965(23.2%)           |
| <b>number of positive lymph node</b>  | 1(0-3)                |
| 0 positive lymph node                 | 2887(34.0%)           |
| 1-3 positive lymph nodes              | 3528(41.6%)           |
| ≥4 positive lymph nodes               | 2065(24.4%)           |
| <b>number of examined lymph nodes</b> | 14(9-20)              |

402 Abbreviations: IQR = interquartile range

403

404

**Table S2** Characteristics of patients with positive or negative nodal status.

| Variable                              | Median(IQR)/N% |              | p-value |
|---------------------------------------|----------------|--------------|---------|
|                                       | N0             | N+           |         |
| <b>Age(years)</b>                     | 66(59-74)      | 65(58-73)    | p=0.009 |
| <b>Race</b>                           |                |              | p=0.005 |
| White                                 | 2311(80.0%)    | 4624(82.7%)  |         |
| Black                                 | 307(10.7%)     | 551(9.9%)    |         |
| Other                                 | 269(9.3%)      | 418(7.4%)    |         |
| <b>Sex</b>                            |                |              | p=0.098 |
| Male                                  | 1418(49.1%)    | 2853(51.0%)  |         |
| Female                                | 1469(50.9%)    | 2740(49.0%)  |         |
| <b>Marital status</b>                 |                |              | p=0.222 |
| Married                               | 1788(61.9%)    | 3511(62.8%)  |         |
| Never married                         | 313(10.8%)     | 649(11.6%)   |         |
| Other                                 | 686(23.9%)     | 1274(22.8%)  |         |
| Unknown                               | 100(3.5%)      | 159(2.8%)    |         |
| <b>Date of diagnosis</b>              |                |              | p=0.704 |
| 2004-2006                             | 627(21.7%)     | 1189(21.3%)  |         |
| 2007-2010                             | 1048(36.3%)    | 2081(37.2%)  |         |
| 2011-2014                             | 1212(50.0%)    | 2323(41.5%)  |         |
| <b>Tumor site</b>                     |                |              | p<0.001 |
| head                                  | 2265(78.5%)    | 4902(87.6%)  |         |
| body or tail                          | 622(21.5%)     | 691(12.4%)   |         |
| <b>Tumor grade</b>                    |                |              | p<0.001 |
| I                                     | 359(12.4%)     | 442(7.9%)    |         |
| II                                    | 1388(48.1%)    | 2728(48.8%)  |         |
| III                                   | 818(28.3%)     | 2133(38.1%)  |         |
| IV                                    | 27(0.9%)       | 47(0.8%)     |         |
| not determined                        | 295(10.2%)     | 243(4.3%)    |         |
| <b>Tumor size</b>                     | 30(21-40) mm   | 33(25-40) mm | p<0.001 |
| ≤2cm                                  | 706(24.5%)     | 759(13.6%)   | p<0.001 |
| >2cm and ≤4cm                         | 1612(55.8%)    | 3438(61.5%)  |         |
| >4cm                                  | 569(19.7%)     | 1396(24.9%)  |         |
| <b>Number of positive lymph nodes</b> |                |              |         |
| 0 positive lymph node                 | 2887(100%)     | 0            |         |
| 1-3 positive lymph nodes              | 0              | 3528(63.1%)  |         |
| ≥4 positive lymph nodes               | 0              | 2065(36.9%)  |         |
| <b>Number of examined lymph nodes</b> | 12(6-18)       | 15(10-22)    | p<0.001 |

Abbreviations: IQR = interquartile range; N0 = negative nodal status; N+ = positive nodal status.

**Table S3** Characteristics of patients with PDAC in head or body&tail of pancreas in SEER.

| <b>Variable</b>                       | <b>Median(IQR)/N%</b> |              |         |
|---------------------------------------|-----------------------|--------------|---------|
| <b>Site of tumor</b>                  | head                  | body&tail    | p-value |
| <b>Age(years)</b>                     | 65(58-73)             | 67(59-75)    | p=0.001 |
| <b>Race</b>                           |                       |              |         |
| White                                 | 5920(82.6%)           | 1015(77.3%)  | p<0.001 |
| Black                                 | 698(9.7%)             | 160(12.2%)   |         |
| Other                                 | 549(7.7%)             | 138(10.5%)   |         |
| <b>Sex</b>                            |                       |              | p=0.034 |
| Male                                  | 3645(50.9%)           | 626(47.7%)   |         |
| Female                                | 3522(49.1%)           | 687(52.3%)   |         |
| <b>Marital status</b>                 |                       |              | p=0.644 |
| Married                               | 4467(62.3%)           | 832(63.4%)   |         |
| Never married                         | 824(11.5%)            | 138(10.5%)   |         |
| Other                                 | 1661(23.2%)           | 299(22.8%)   |         |
| Unknown                               | 215(3.0%)             | 44(3.4%)     |         |
| <b>Date of diagnosis</b>              |                       |              | p<0.001 |
| 2004-2006                             | 1591(22.2%)           | 225(17.1%)   |         |
| 2007-2010                             | 2656(37.1%)           | 473(36.1%)   |         |
| 2011-2014                             | 2920(40.7%)           | 615(46.8%)   |         |
| <b>Tumor grade</b>                    |                       |              | p=0.097 |
| I+II                                  | 4126(57.6%)           | 791(60.2%)   |         |
| III+IV                                | 2591(36.1%)           | 434(33.1%)   |         |
| not determined                        | 450(6.3%)             | 88(6.7%)     |         |
| <b>Tumor size</b>                     | 30(24-40) mm          | 40(26-52) mm | p<0.001 |
| ≤2cm                                  | 1282(17.9%)           | 183(13.9%)   | p<0.001 |
| >2cm and ≤4cm                         | 4487(62.6%)           | 563(42.9%)   |         |
| >4cm                                  | 1398(19.5%)           | 567(4.3%)    |         |
| <b>Number of positive lymph nodes</b> | 2(0-4)                | 1(0-2)       | p<0.001 |
| 0 positive lymph node                 | 2265(31.6%)           | 622(47.4%)   | p<0.001 |
| 1-3 positive lymph nodes              | 3026(42.2%)           | 502(38.2%)   |         |
| ≥4 positive lymph nodes               | 1876(26.2%)           | 189(14.4%)   |         |
| <b>Number of examined lymph nodes</b> | 14(9-21)              | 12(7-19)     | p<0.001 |

409

Abbreviations: IQR = interquartile range; head = head of pancreas; body&amp;tail = body and tail of pancreas.

410

411

**Table S4** Characteristics of patients in training cohort and internal validation cohort.

| Variable                              | Median(IQR)/N% |                            | p-value |
|---------------------------------------|----------------|----------------------------|---------|
|                                       | train cohort   | internal validation cohort |         |
| <b>Age(years)</b>                     | 66(58-73)      | 66(58-74)                  | p=0.159 |
| <b>Race</b>                           |                |                            | p=0.307 |
| White                                 | 4866(82.0%)    | 2069(81.3%)                |         |
| Black                                 | 582(9.8%)      | 276(10.9%)                 |         |
| Other                                 | 488(8.2%)      | 199(7.8%)                  |         |
| <b>Sex</b>                            |                |                            | p=0.270 |
| Male                                  | 3013(50.8%)    | 1258(49.4%)                |         |
| Female                                | 2923(49.2%)    | 1286(50.6%)                |         |
| <b>Marital status</b>                 |                |                            | p=0.072 |
| Married                               | 3715(62.6%)    | 1584(62.3%)                |         |
| Never married                         | 689(11.6%)     | 273(10.7%)                 |         |
| Other                                 | 1338(22.5%)    | 622(24.4%)                 |         |
| Unknown                               | 194(3.3%)      | 65(2.6%)                   |         |
| <b>Date of diagnosis</b>              |                |                            | p=0.741 |
| 2004-2006                             | 1258(21.2%)    | 558(21.9%)                 |         |
| 2007-2010                             | 2194(37.0%)    | 935(36.8%)                 |         |
| 2011-2014                             | 2484(41.8%)    | 1051(41.3%)                |         |
| <b>Tumor site</b>                     |                |                            | p=0.642 |
| head                                  | 5024(84.6%)    | 2143(84.2%)                |         |
| body or tail                          | 912(15.4%)     | 401(15.8%)                 |         |
| <b>Tumor grade</b>                    |                |                            | p=0.604 |
| I+II                                  | 3421(57.6%)    | 1496(58.8%)                |         |
| III+IV                                | 2135(36.0%)    | 890(35.0%)                 |         |
| not determined                        | 380(6.4%)      | 158(6.2%)                  |         |
| <b>Tumor size</b>                     |                |                            | p=0.357 |
| ≤2cm                                  | 1047(17.6%)    | 418(16.4%)                 |         |
| >2cm and ≤4cm                         | 3511(59.1%)    | 1539(60.5%)                |         |
| >4cm                                  | 1378(23.3%)    | 587(23.1%)                 |         |
| <b>number of positive lymph nodes</b> |                |                            | p=0.168 |
| 0 positive lymph node                 | 2058(34.7%)    | 829(32.6%)                 |         |
| 1-3 positive lymph nodes              | 2452(41.3%)    | 1076(42.3%)                |         |
| ≥4 positive lymph nodes               | 1426(24.0%)    | 639(25.1%)                 |         |
| <b>number of examined lymph nodes</b> | 14(9-21)       | 14(9-20)                   | p=0.987 |

413

Abbreviations: IQR=interquartile range

414

**Table S5** Prognostic homogeneity comparison between 8<sup>th</sup> AJCC staging system and our staging system in internal validation set.

|         | 8th AJCC-IA |    | 8th AJCC-IB |    | 8th AJCC-IIA |    | 8th AJCC-IIB |    | 8th AJCC-III |    | p-value |
|---------|-------------|----|-------------|----|--------------|----|--------------|----|--------------|----|---------|
|         | n           | MS | n           | MS | n            | MS | n            | MS | n            | MS |         |
| RPA-I   | 173         | 40 |             |    |              |    |              |    |              |    | -       |
| RPA-II  |             |    | 415         | 27 |              |    | 129          | 30 | 22           | 18 | p=0.372 |
| RPA-III | 10          | 38 | 67          | 23 | 147          | 20 | 631          | 19 | 169          | 18 | p=0.147 |
| RPA-IV  |             |    |             |    | 17           | 31 | 244          | 16 | 259          | 14 | p=0.058 |
| RPA-V   |             |    |             |    |              |    | 72           | 12 | 189          | 12 | p=0.294 |
| p-value | p=0.9051    |    | p=0.0434    |    | p=0.5469     |    | p<0.0001     |    | p<0.0001     |    |         |

Abbreviations: AJCC= American Joint Committee on Cancer; MS=median survival; RPA=recursive partitioning analysis

**Table S6** Lymph node metastasis and T stage of pancreatic ductal carcinoma.

|               | T1    | T2    | T3    |
|---------------|-------|-------|-------|
| All           | 1465  | 5050  | 1965  |
| N+            | 759   | 3438  | 1396  |
| Positive rate | 51.8% | 68.1% | 71.0% |

Abbreviations: N+ = positive nodal status

**Table S7** Characteristics of patients of R0 with number of examined lymph nodes (eNs)<5.5 and lymph node-positive patients with positive lymph nodes ratios (LNR) <0.078.

|                                       | Median(IQR)/N% |                 | p-value |
|---------------------------------------|----------------|-----------------|---------|
|                                       | 0<LNR<0.078    | R0 with eNs<5.5 |         |
| <b>Age(years)</b>                     | 64 (57-72)     | 67 (59-74)      | p<0.001 |
| <b>Race</b>                           |                |                 | p=0.689 |
| White                                 | 746(80.4%)     | 463(79.3%)      |         |
| Black                                 | 105(11.3%)     | 65(11.1%)       |         |
| Other                                 | 77(8.3%)       | 56(9.6%)        |         |
| <b>Sex</b>                            |                |                 | p=0.053 |
| Male                                  | 450(48.5%)     | 313(53.6%)      |         |
| Female                                | 478(51.5%)     | 271(46.4%)      |         |
| <b>Marital status</b>                 |                |                 | p=0.214 |
| Married                               | 572(61.6%)     | 356(61.0%)      |         |
| Never married                         | 92(9.9%)       | 60(10.3%)       |         |
| Other                                 | 228(24.6%)     | 156(26.7%)      |         |
| Unknown                               | 36(3.9%)       | 12(2.0%)        |         |
| <b>Date of diagnosis</b>              |                |                 | p<0.001 |
| 2004-2006                             | 153(16.5%)     | 192(32.9%)      |         |
| 2007-2010                             | 316(34.1%)     | 231(39.6%)      |         |
| 2011-2014                             | 459(49.4%)     | 161(27.5%)      |         |
| <b>Tumor grade</b>                    |                |                 | p<0.001 |
| I+II                                  | 537(57.9%)     | 362(62.0%)      |         |
| III+IV                                | 350(37.7%)     | 152(26.0%)      |         |
| not determined                        | 41(4.4%)       | 70(12.0%)       |         |
| <b>Tumor size</b>                     | 31(25-40)mm    | 30(21-40)mm     | p=0.349 |
| <b>Number of examined lymph nodes</b> | 21(16-28)      | 3(2-4)          | p<0.001 |

Abbreviations: IQR = interquartile range; LNR = positive lymph nodes ratios; R0 = negative nodal status; eNs: examined lymph nodes.
